# Supplementary material for: Molecular Insights into the Role of Cysteine-Rich Peptides in Induced Resistance to Fusarium oxysporum Infection in Tomato Based on Transcriptome Profiling
Source: MDPI journal article supplement (doi:10.3390/ijms22115741), 2021-05-27
Supplement: s1 [file s1]

**Table S2.** Assembly statistics.

| <b>Parameters</b>   | <b>Number of raw assembled contigs</b> | <b>Number of CDS</b> |
|---------------------|----------------------------------------|----------------------|
| Number of sequences | 137158                                 | 45095                |
| N50, bp             | 2190                                   | 1341                 |
| Median length, bp   | 382                                    | 798                  |
| Average length, bp  | 1000,48                                | 1036,39              |
| Maximal length, bp  | 20864                                  | 15315                |
