# Supplementary material for: Molecular Insights into the Role of Cysteine-Rich Peptides in Induced Resistance to Fusarium oxysporum Infection in Tomato Based on Transcriptome Profiling
Source: MDPI journal article supplement (doi:10.3390/ijms22115741), 2021-05-27
Supplement: s1 [file s1]

**Table S1.** Reads statistics.

| <b>Sample</b> | <b>Number of raw reads</b> | <b>Number of trimmed reads</b> | <b>Number of uniquely mapped reads</b> |
|---------------|----------------------------|--------------------------------|----------------------------------------|
| Cont (a)      | 44368206                   | 40463022                       | 36396638                               |
| Cont (b)      | 80155548                   | 72350380                       | 66873112                               |
| Inf-4 (a)     | 60111090                   | 54870442                       | 51991574                               |
| Inf-4 (b)     | 78014612                   | 71970474                       | 66674266                               |
| Ind (a)       | 52592046                   | 48434626                       | 46017998                               |
| Ind (b)       | 59905032                   | 54606326                       | 50761996                               |
| Inf-2 (a)     | 63474308                   | 58424784                       | 53911254                               |
| Inf-2 (b)     | 64401390                   | 59064290                       | 54421814                               |
| IR (a)        | 148867186                  | 137637508                      | 131677132                              |
| IR (b)        | 123715738                  | 114429278                      | 105805514                              |

Note: (a) and (b) – sample replicate.
