# Supplementary material for: Molecular Insights into the Role of Cysteine-Rich Peptides in Induced Resistance to Fusarium oxysporum Infection in Tomato Based on Transcriptome Profiling
Source: MDPI journal article supplement (doi:10.3390/ijms22115741), 2021-05-27
Supplement: s1 [file s1]

**Table S6.** Up- and down-regulated CRP genes in IR-expressing *S. lycopersicum* plants <sup>1</sup>

| Up-regulated        |                     | Down-regulated      |                     |
|---------------------|---------------------|---------------------|---------------------|
| IR/Ind <sup>2</sup> | IR/Inf <sup>3</sup> | IR/Ind <sup>2</sup> | IR/Inf <sup>3</sup> |
|                     | SIDEFL1             |                     | SIDEFL4             |
| SISN1               | SISN1               | SISN3               |                     |
| SISN2               | SISN2               | SISN5               |                     |
| SISN9               | SISN3               |                     |                     |
| SISN10              | SISN4               |                     |                     |
|                     | SISN6               |                     |                     |
|                     | SISN7               |                     |                     |
|                     | SISN8               |                     |                     |
|                     | SISN9               |                     |                     |
|                     | SISN10              |                     |                     |
|                     | SiThi3              |                     |                     |
| SILTP1.4            | SILTP1.1            | SILTP1.5            |                     |
| SILTPd3.1           | SILTP1.2            | SILTP2.1            |                     |
| SILTPd6.5           | SILTP1.5            | SILTPd6.1           |                     |
| SILTPg1.1           | SILTPd2.2           | SILTPd6.2           |                     |
| SILTPg2.4           | SILTPd2.3           | SILTPd6.3           |                     |
| SILTPg2.6           | SILTPd6.1           | SILTPd6.6           |                     |
| SILTPg2.7           | SILTPd6.3           | SILTPd6.9           |                     |
| SILTPx2.1           | SILTPd6.5           | SILTPd6.10          |                     |
|                     | SILTPd6.6           |                     |                     |
|                     | SILTPd6.8           |                     |                     |
|                     | SILTPd6.9           |                     |                     |
|                     | SILTPd6.10          |                     |                     |
|                     | SILTPg2.6           |                     |                     |
|                     | SILTPg2.9           |                     |                     |
| SiHev1              |                     |                     | SiHev1              |
|                     | SiKnot1             |                     |                     |
|                     | SiKnot2             |                     |                     |
|                     | SIRALF2             |                     |                     |
|                     | SIRALF5             |                     |                     |
|                     | SIRALF6             |                     |                     |
|                     | SIRALF7             |                     |                     |
| SiOlee1.4           |                     |                     |                     |
| SiOlee6.2           | SiOlee6.2           |                     |                     |
|                     |                     |                     | SiEPF3              |
|                     | SiCRP1              |                     |                     |
| SIPR-1.2            | SIPR-1.1            | SIPR-1.5            | SIPR-1.6            |
| SIPR-1.3            | SIPR-1.2            | SIPR-1.6            | SIPR-1.7            |
|                     | SIPR-1.4            |                     | SIPR-1.8            |
|                     |                     |                     | SIPR-4.1            |

<sup>1</sup> Up-regulated genes are those with an expression fold change  $\geq 2$ , down-regulated genes are those with an expression fold change  $\leq 0.5$ . <sup>2</sup> Differentially expressed genes in IR-expressing plants compared to those treated with the elicitors. <sup>3</sup> Differentially expressed genes in IR-expressing tomato plants compared to those infected with *F. oxysporum*. Genes up-regulated in both variants are highlighted yellow. Genes down-regulated in both variants are highlighted green.
