# Supplementary material for: Molecular Insights into the Role of Cysteine-Rich Peptides in Induced Resistance to Fusarium oxysporum Infection in Tomato Based on Transcriptome Profiling
Source: MDPI journal article supplement (doi:10.3390/ijms22115741), 2021-05-27
Supplement: s1 [file s1]

**Table S5.** CRP genes responsive to *F. sambucinum* elicitors, *F. oxysporum* infection and to *F. oxysporum* infection after elicitor treatment <sup>1</sup>

| Up-regulated            |                         |                       |                      | Down-regulated          |                         |                       |                      |
|-------------------------|-------------------------|-----------------------|----------------------|-------------------------|-------------------------|-----------------------|----------------------|
| Inf-2/Cont <sup>2</sup> | Inf-4/Cont <sup>2</sup> | Ind/Cont <sup>3</sup> | IR/Cont <sup>4</sup> | Inf-2/Cont <sup>2</sup> | Inf-4/Cont <sup>2</sup> | Ind/Cont <sup>3</sup> | IR/Cont <sup>4</sup> |
| SIDEFL4                 | SIDEFL4                 | SIDEFL1               | SIDEFL1              |                         |                         |                       |                      |
|                         |                         | SIDEFL2               | SIDEFL2              |                         |                         |                       |                      |
|                         |                         | SISN3                 | SISN1                | SISN3                   | SISN2                   | SISN10                |                      |
|                         |                         | SISN4                 | SISN3                | SISN4                   | SISN3                   | SISN11                |                      |
|                         |                         | SISN5                 | SISN4                | SISN5                   | SISN5                   |                       |                      |
|                         |                         | SISN6                 | SISN5                | SISN6                   | SISN9                   |                       |                      |
|                         |                         | SISN7                 | SISN6                | SISN9                   | SISN11                  |                       |                      |
|                         |                         | SISN8                 | SISN7                | SISN11                  |                         |                       |                      |
|                         |                         |                       | SISN8                |                         |                         |                       |                      |
|                         |                         |                       | SISN9                |                         |                         |                       |                      |
|                         |                         | SiThi3                | SiThi3               |                         |                         |                       |                      |
| SILTPg1.1               | SILTP1.2                | SILTP1.1              | SILTP1.1             | SILTP1.5                | SILTPd6.1               | SILTP1.4              | SILTP1.4             |
| SILTPg2.4               | SILTP2.3                | SILTP1.2              | SILTP1.2             | SILTPd6.2               | SILTPd6.2               | SILTPg1.2             |                      |
| SILTPg2.6               | SILTPg1.1               | SILTP1.5              | SILTP1.5             | SILTPd6.3               | SILTPd6.3               |                       |                      |
| SILTPg2.7               | SILTPg2.6               | SILTP2.1              | SILTP2.3             | SILTPd6.9               | SILTPd6.6               |                       |                      |
| SILTPx2.1               | SILTPg2.7               | SILTP2.3              | SILTPd2.2            | SILTPd6.10              | SILTPd6.9               |                       |                      |
|                         | SILTPx2.1               | SILTPd2.2             | SILTPd2.3            | SILTPg2.2               |                         |                       |                      |
|                         |                         | SILTPd2.3             | SILTPd3.1            |                         |                         |                       |                      |
|                         |                         | SILTPd6.1             | SILTPd6.1            |                         |                         |                       |                      |
|                         |                         | SILTPd6.2             | SILTPd6.5            |                         |                         |                       |                      |
|                         |                         | SILTPd6.3             | SILTPd6.8            |                         |                         |                       |                      |
|                         |                         | SILTPd6.6             | SILTPd6.9            |                         |                         |                       |                      |
|                         |                         | SILTPd6.8             | SILTPd6.10           |                         |                         |                       |                      |
|                         |                         | SILTPd6.9             | SILTPg1.1            |                         |                         |                       |                      |
|                         |                         | SILTPd6.10            | SILTPg2.4            |                         |                         |                       |                      |
|                         |                         | SILTPg2.5             | SILTPg2.5            |                         |                         |                       |                      |
|                         |                         |                       | SILTPg2.6            |                         |                         |                       |                      |

|           |           |          |           |           |           |           |           |
|-----------|-----------|----------|-----------|-----------|-----------|-----------|-----------|
|           |           |          | SILTPg2.7 |           |           |           |           |
|           |           |          | SILTPx2.1 |           |           |           |           |
| SIHev1    | SIHev1    | SIHev1   | SIHev1    |           |           |           |           |
|           |           |          | SIKnot1   | SIKnot1   | SIKnot1   |           |           |
|           | SIKnot2   | SIKnot2  | SIKnot2   |           |           |           |           |
|           |           | SIRALF5  | SIRALF5   | SIRALF3   | SIRALF3   |           |           |
|           |           | SIRALF6  | SIRALF6   | SIRALF6   |           |           |           |
|           |           |          |           | SIRALF7   | SIRALF7   |           |           |
|           |           |          |           | SIMEG2    | SIMEG2    | SIMEG1    |           |
| SlOlee1.3 |           |          |           |           | SlOlee1.2 | SlOlee1.2 | SlOlee1.2 |
| SlOlee1.4 | SlOlee1.4 |          | SlOlee1.4 |           |           |           |           |
|           |           |          |           | SlOlee6.2 | SlOlee6.2 | SlOlee6.2 |           |
|           |           | SIEPF6   | SIEPF6    | SIEPF1    |           | SIEPF3    | SIEPF3    |
| SIEPF7    | SIEPF7    | SIEPF7   | SIEPF7    | SIEPF5    | SIEPF5    | SIEPF5    |           |
|           |           |          | SICRP1    |           |           |           |           |
|           | SIPR-1.8  |          | SIPR-1.1  | SIPR-1.5  |           |           | SIPR-1.6  |
|           |           |          | SIPR-1.2  |           |           |           | SIPR-1.7  |
|           |           |          | SIPR-1.3  |           |           |           |           |
| SIPR-1.4  |           | SIPR-1.4 | SIPR-1.4  |           |           |           |           |
|           |           |          |           |           |           |           | SIPR-4.1  |

<sup>1</sup> Differentially expressed genes are those with an expression fold change  $\geq 2$  (up-regulation) or  $\leq 0.5$  (down-regulation). <sup>2</sup> Genes responsive to *F. oxysporum* infection (Inf) at 2 and 4 dpi compared to control plants (Cont). <sup>3</sup> Genes responsive to *F. sambucinum* elicitors (Ind) compared to control plants (Cont). <sup>4</sup> Genes responsive to *F. oxysporum* infection after elicitor treatment (in IR-expressing plants) compared to control plants (Cont). Genes up-regulated in both Inf variants are highlighted orange (or light yellow in case genes up-regulated in all 4 variants). Genes up-regulated in all 3 variants (Inf-4, Ind, IR) are highlighted yellow. Genes up-regulated only in IR-expressing plants (primed by the elicitors) are highlighted blue. Genes down-regulated in both Inf variants are highlighted purple. Genes down-regulated in all 3 variants (Inf-4, Ind, IR) are highlighted green.
