# Supplementary material for: Molecular Insights into the Role of Cysteine-Rich Peptides in Induced Resistance to Fusarium oxysporum Infection in Tomato Based on Transcriptome Profiling
Source: MDPI journal article supplement (doi:10.3390/ijms22115741), 2021-05-27
Supplement: s1 [file s1]

**Table S7.** List of primers for RT-PCR validation.

| Nº  | Gene             | Pr_dir 5' → 3'            | Pr_rev 5' → 3'          | Length (bp) | T primer annealing (°C) |
|-----|------------------|---------------------------|-------------------------|-------------|-------------------------|
| 1.  | <i>SISN1</i>     | TCTCTAACGTGGTCGAGGGT      | AGGGCATGATTGTTTGTGTC    | 176         | 59                      |
| 2.  | <i>SISN7</i>     | TGTTCAAAGGCAGGACGACA      | AGGACATTTAGGCCCTCCCT    | 133         | 59                      |
| 3.  | <i>SIRALF1</i>   | AGGGGAGTATTGCAGAGTGC      | TTGAGCTCCAGGTTTGCAGT    | 173         | 59                      |
| 4.  | <i>SIRALF7</i>   | AGGTGCAACAAGTAACTGAAGC    | CCGTCGCGTCGAAAGATAGA    | 120         | 59                      |
| 5.  | <i>SIMEG2</i>    | CATGCTGCCCCAATTTACAA      | GCAAGCATACTGCTTTAGCCC   | 169         | 60                      |
| 6.  | <i>SIOlee1.2</i> | TGCCAAGATCCTTGAGGGTC      | ACTCTTGTTGGGTGAAGGGC    | 148         | 60                      |
| 7.  | <i>SIThi2</i>    | TTCGTGTGCGAGAGAGTCTG      | TGACACAGACAGTACGAGCG    | 151         | 61                      |
| 8.  | <i>SIDEFL2</i>   | TGCTTGTCATGGCTACTGGAC     | GGTCTCACATACCGAGGCAC    | 119         | 62                      |
| 9.  | <i>SIDEFL8</i>   | CCTACTGGTGTGGTTGTCCC      | GGACCCTCCATTTCCACAG     | 86          | 59                      |
| 10. | <i>SIKnot1</i>   | GCTGCTCAAGATGTGATGGC      | TCCAACAGGCCTGACAGAAC    | 130         | 59                      |
| 11. | <i>SILTPd6.8</i> | AATGGCCAAGTTTGGTGCAAC     | CAAGGTGCACTAAGTCATTTAGC | 251         | 60                      |
| 12. | <i>SILTP1.5</i>  | AAGCCTTAAGCTGTGGGCAA      | GAAGATCAGCAGCTTTGCGG    | 210         | 61                      |
| 13. | <i>SILTP2.3</i>  | TTGCCTTAGCGCGATCACAT      | GGGGTAGGGAACACCACAAG    | 169         | 59                      |
| 14. | <i>SICRP1</i>    | TGTTTCCTTGCTATGTTTGTGTTGA | GGCAAGGCACAAAGTTAGGC    | 128         | 60                      |
| 15. | <i>SIEPF1</i>    | GGGTTTCGATGCCACCAAGTT     | TCTAGTGGTGTGGTGCATGG    | 151         | 62                      |
| 16. | <i>EF1-α</i>     | ACCTTTGCTGAATACCCTCCATTG  | CACAGTTCCTTCCCCTTCTTCTG | 150         | 59-62                   |
| 17. | <i>SIHev1</i>    | TGGGCATGATCACACCCTAT      | AAGCCTACAACACAACGTCT    | 431         | 58                      |
